# Supplementary material for: Phyto-synthesized facile Pd/NiOPdO ternary nanocomposite for electrochemical supercapacitor applications
Source: Royal Society of Chemistry journal article supplement (doi:10.1039/d2ra07292k), 2022-01-01
Supplement: d2ra07292k1.pdf [file d2ra07292k1.pdf]

## Supplementary Information

### Phyto-Synthesized Facile Pd/NiOPdO Ternary Nanocomposite for Electrochemical Supercapacitor Applications

Irum Shaheen<sup>a,d</sup>, Khuram Shahzad Ahmad<sup>a\*</sup>, Camila Zequine<sup>b</sup>, Ram K. Gupta<sup>b</sup>,  
Andrew G. Thomas<sup>c</sup>, Anjum Qureshi,<sup>d</sup> Mohammad Azad Malik<sup>c</sup> and Javed H. Niazi<sup>d</sup>

<sup>a</sup>Department of Environmental Sciences, Fatima Jinnah Women University, Rawalpindi,  
Pakistan.

<sup>b</sup>Department of Chemistry, Pittsburg State University, 1701 South Broadway Street  
Pittsburg, KS 66762, USA.

<sup>c</sup>Department of Materials, Photon Science Institute and Sir Henry Royce Institute, Alan  
Turing Building, University of Manchester, Oxford Road, Manchester M13 9PL, U.K.

<sup>d</sup>Sabancı University, SUNUM Nanotechnology Research and Application Center, Orta Mah.  
Tuzla 34956 Istanbul, Turkey.

\*Email: chemist.phd33@yahoo.com; dr.k.s.ahmad@fjwu.edu.pk.

#### Electrochemical Measurement

Electrochemical characterizations of synthesized nanomaterial were carried out using three electrode system VersaSTAT 4-500 electrochemical workstation (Princeton Applied Research, USA).

**Cyclic voltammetry (CV):** CV was performed by cycling the potential of fabricated electrodes and then measured the corresponding current densities. The purpose of CV was to monitor the redox (oxidation-reduction) behavior of the electrode material within an applied potential range. In the present study, CV analysis of all fabricated electrodes was carried out at scan rate ranged from 2-300 mV/s and at potential window of 0-0.6 V. The current at the prepared electrodes was monitored as a triangular excitation potential was applied. The integrated area of CV curve is significantly important as it reflects the capacitance of the electrode. The

specific capacitance ( $C_{sp}$ ) of the fabricated electrodes was calculated using following relation.

5-6,24

$$C_{sp} = \frac{\int IdV}{v \cdot \Delta V \cdot A} \dots (1)$$

Where,  $\int IdV$  is integral area of CV curve,  $v$  is scan rate,  $\Delta V$  is the potential window and  $A$  is active area of electrode material on the electrode (or mass of active material on electrode).

**Galvanostatic charge–discharge (GCD):** Galvanostatic charge discharge (GCD) was also used to study the behavior of electrodes at different current densities. GCD was used to calculate the capacitance of the prepared electrodes.<sup>24</sup> The GCD profile for the investigated electrodes was recorded at the applied current density ranged from 0.5-30 A/g. At each current density  $C_{sp}$  was calculated using the following equation.<sup>5-6, 19,24</sup>

$$C_{sp} = \frac{I \times \Delta t}{\Delta V \times m} \dots 2$$

Where,  $I$  is the discharge current (A),  $\Delta t$  is the discharge time (s),  $\Delta V$  is the potential window (V), and  $m$  is the mass (g) of the electrodes.

**Energy density (E) and power density (P):** In order to calculate energy density in the three electrode system following equations were used for making an theoretical 2 electrode symmetric configuration. Based on GCD data, energy density (E) and power density (P) of fabricated electrode were estimated using discharge voltage and the discharge capacitance by following equations.<sup>5-6</sup>

$$E = \frac{C\Delta V^2}{7.2} \dots 3$$

$$P = \frac{E(3600)}{t} \dots 4$$

Where,  $C$  (F/g) is capacitance via galvanostatic charge discharge,  $\Delta V$  (V) is the potential window and  $t$  (s) is the discharge time.  $E$  and  $P$  are expressed as Wh/Kg and W/Kg in the present study.
